# Supplementary material for: A tetranuclear Zn( ii )-based host–guest MOF resistant to thermal quenching
Source: Royal Society of Chemistry journal article supplement (doi:10.1039/d5qi01707f), 2025-01-01
Supplement: d5qi01707f1.pdf [file d5qi01707f1.pdf]

**Electronic Supplementary Information**

**Tetranuclear Zn(II) Based Host-Guest MOF Resistant to Thermal Quenching**

**Xiao-Gang Yang,<sup>\*a</sup> Xin-Ya Zhang,<sup>a</sup> Zhao-Tong Yang,<sup>b</sup> Xin-Ci Wu,<sup>a</sup> Jia-Chen Liu,<sup>a</sup>**

**Xiao-Tian Wei,<sup>a</sup> Hua-Rui Wang<sup>\*a</sup> and Lu-Fang Ma<sup>a</sup>**

<sup>a</sup>College of Chemistry and Chemical Engineering, Luoyang Normal University, Luoyang 471934, P. R. China.

<sup>b</sup>Department of Chemistry and Materials Science, Xi'an Jiaotong-Liverpool University, Suzhou 215123, P. R. China.

*E-mail:* yxg2233@126.com; wanghrly@126.com

## **A. Experimental Section.**

### **1. Materials and general procedures.**

All reagents were of analytical grade and obtained from commercial sources without further purification. Powder X-ray diffraction (PXRD) patterns were measured at room temperature using a Bruker D8-ADVANCE X-ray diffractometer with Cu  $K\alpha$  radiation ( $\lambda = 1.5418 \text{ \AA}$ ). Intensity data were collected in a  $2\theta$  range of  $5\text{--}50^\circ$  with a step of  $0.02^\circ$  ( $2\theta$ ) and a counting time of 0.2 s/step. Elemental analyses for C, H, and N were carried out on a Flash 2000 organic elemental analyzer. Thermogravimetric analysis (TGA) experiments were carried out using SII EXStar6000 TG/DTA6300 thermal analyzer from room temperature to  $700^\circ\text{C}$  under a nitrogen atmosphere at a heating rate of  $10^\circ\text{C min}^{-1}$ . The IR spectrum was recorded in the range of  $4000\text{--}400 \text{ cm}^{-1}$  on a Nicolet 6700 (Thermo) FT-IR spectrometer with KBr pellets. UV-Vis spectra were recorded on Hitachi UH4150 spectrophotometer in the range of  $250\text{--}800 \text{ nm}$  with a slit of  $2 \text{ nm}$ . Photoluminescence (PL) spectra and decay curve were tested on Edinburgh FLS1000 fluorescence spectrometer equipped with a xenon arc lamp (Xe900) and nanosecond flash-lamp (nF900), respectively. The temperature dependence PL spectra were measured using a temperature controller attached to a cryostat (Oxford Ltd. Optistat DN2) using an FLS1000 fluorescence spectrometer. The morphologies of the title MOF before and after thermal quenching measurements were investigated by a field emission scanning electron microscope (SEM, Zeiss Sigma 500) at  $5 \text{ kV}$ . X-ray photoelectron spectroscopy (XPS) measurements were performed with the Thermo Scientific K-Alpha and equipped with a non-monochromatized source (at  $150 \text{ W}$ ).

Single-crystal X-ray diffraction data for  $[\text{AD}][\text{Zn}_2(\text{IPOIPA})_2(\mu_3\text{-OH})]$  (**1**) were collected using an Oxford Diffraction SuperNova area-detector diffractometer and mirror optics monochromated Mo  $K\alpha$  radiation ( $\lambda = 0.71073 \text{ \AA}$ ) at room temperature. CrysAlisPro<sup>[1]</sup> was used for the data collection, data reduction, and empirical absorption correction. The crystal structure was solved by direct methods, using SHELXT-2014<sup>[2]</sup>, and refined by the full matrix on  $F^2$  using the program SHELXL-2014<sup>[3]</sup>. All other non-hydrogen atoms were refined with anisotropic thermal displacement parameters. The crystallographic data and selected bond lengths and angles for **1** were listed in Tables S1 and S2. Crystallographic data for the structural analyses have been deposited with the Cambridge Crystallographic Data Center. CCDC number for **1** is 2456047. This material can be obtained free of charge via <http://www.ccdc.cam.ac.uk/conts/retrieving.html>, or from the Cambridge Crystallographic Data Centre, 12 Union Road, Cambridge CB2 1EZ, UK; fax: (+44) 1223-336-033; or E-mail: [deposit@ccdc.cam.ac.uk](mailto:deposit@ccdc.cam.ac.uk).

## 2. Synthesis of $[\text{HAD}][\text{Zn}_2(\text{IPOIPA})_2(\mu_3\text{-OH})]$ (**1**) crystals

A mixture of IPOIPA (0.2 mmol, 44.81 mg),  $\text{Zn}(\text{OAc})_2 \cdot 6\text{H}_2\text{O}$  (0.5 mmol, 109.75 mg), AD (0.2 mmol, 35.84 mg) and  $\text{H}_2\text{O}$  (8 mL) was placed in a Teflon-lined stainless steel vessel, heated to 120 °C for two days, and then cooled to room temperature naturally. Greenish-yellow lamellar crystals of **1** were obtained, which were filtered, washed with water and ethanol several times, then dried under room temperature. Yield: 50% (based on Zn). Anal. Calc. (%) for  $\text{C}_{35}\text{H}_{31}\text{NO}_{11}\text{Zn}_2$ : C, 54.42; H, 4.05; N, 1.81; found (%): C, 54.36; H, 3.99; N, 1.67. IR ( $\text{cm}^{-1}$ ): 3429 (w), 2985 (m), 1638 (s), 1585 (s), 1381 (s), 1269 (s), 1026 (s), 908 (m), 785 (s), 726 (s), 598 (m), 467 (m).

### **3. Preparation of the LED device**

A mixture of MOF powders (50 mg) as phosphor and organic silica (about 2 mL) as binder was stirred for 5 min, carefully coated on a commercially available 455 nm blue LED, and then the device was heated at 100 °C for 1 h.

### **4. Electronic structure calculations**

All calculations were performed with the density functional theory (DFT) method using Dmol3 module in Material Studio software package.<sup>[4]</sup> The structure mode were directly used from the crystal structure file of **1**. The initial configuration was fully optimized by Perdew-Wang (PW91) generalized gradient approximation (GGA) method with the double numerical basis sets plus polarization function (DNP).

## B. Supporting Figures

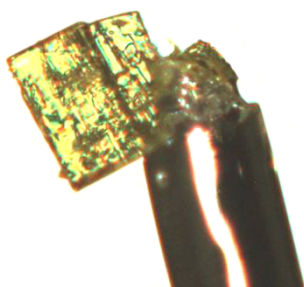

**Figure S1.** Photograph of the crystal of **1** under day light.

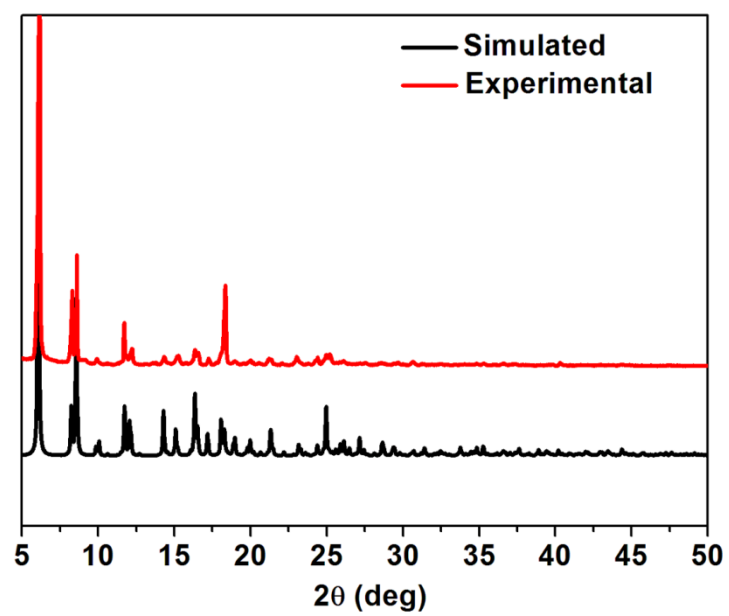

Figure S2. PXRD pattern of 1.

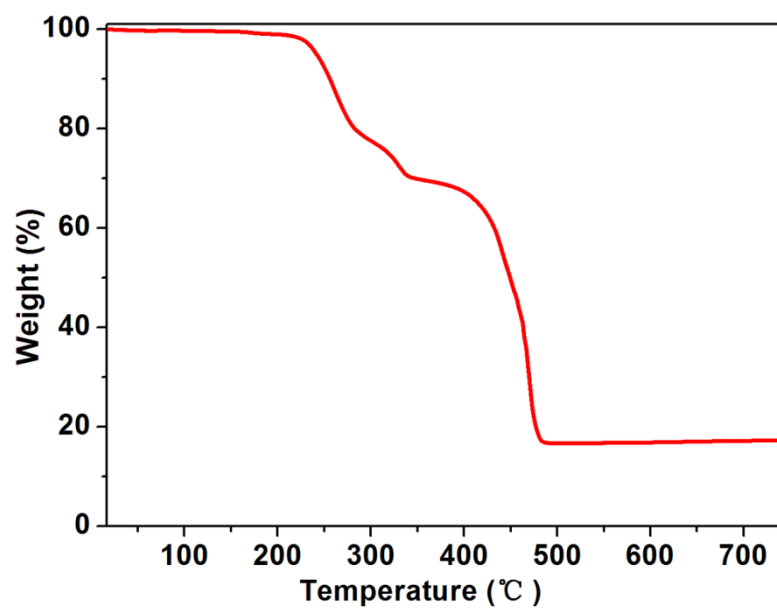

**Figure S3.** Thermogravimetric analysis (TGA) curve of **1**.

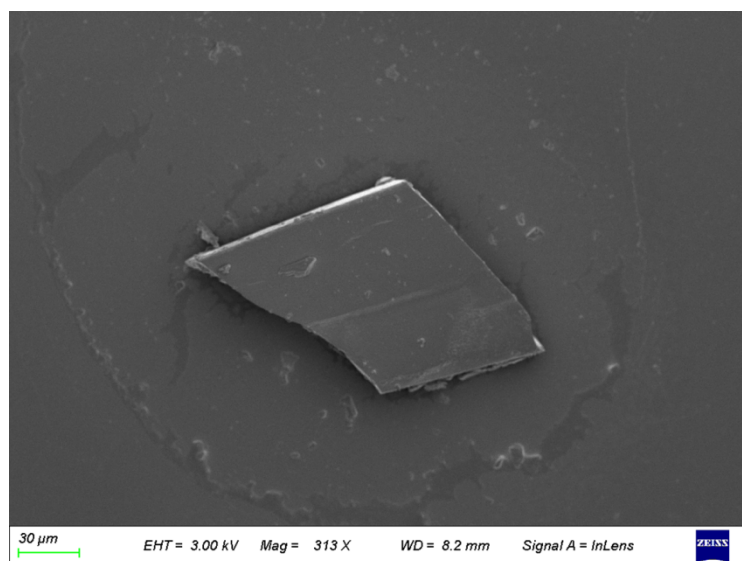

**Figure S4.** SEM image of **1**.



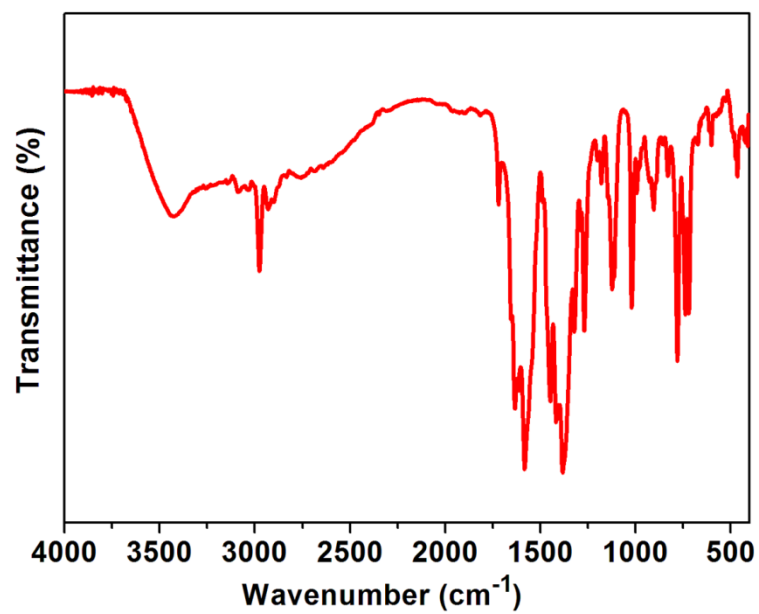

**Figure S5.** FT-IR spectrum of **1**.

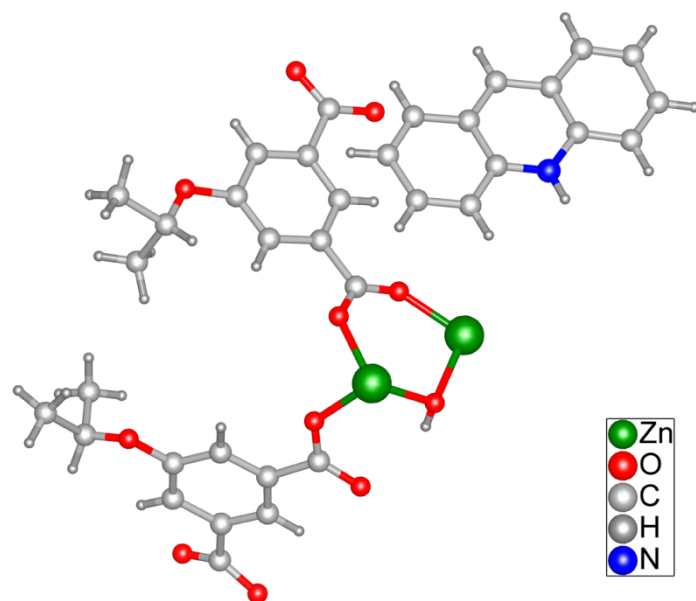

**Figure S6.** View of the asymmetrical unit of **1**.

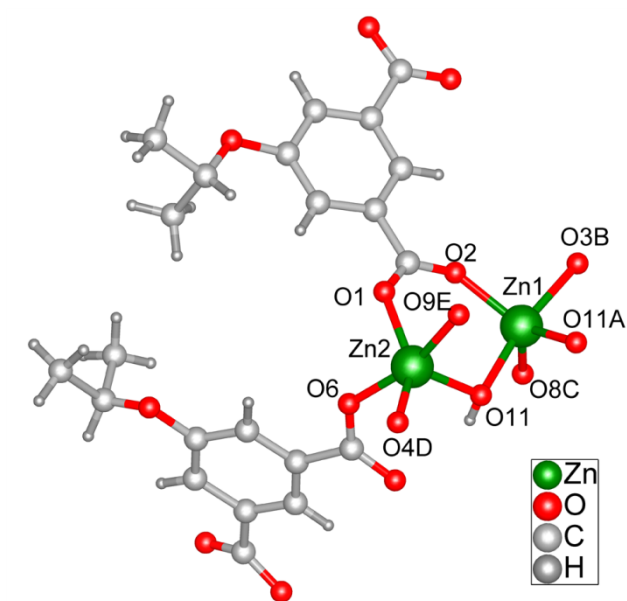

**Figure S7.** View of the coordination environment of Zn(II) atoms in **1**. Symmetry codes: A: 1-X, -Y, 1-Z; B: 2-X, -Y, 1-Z; C: 1-X, -1-Y, 1-Z; D: -1+X, Y, Z; E: X, 1+Y, Z.

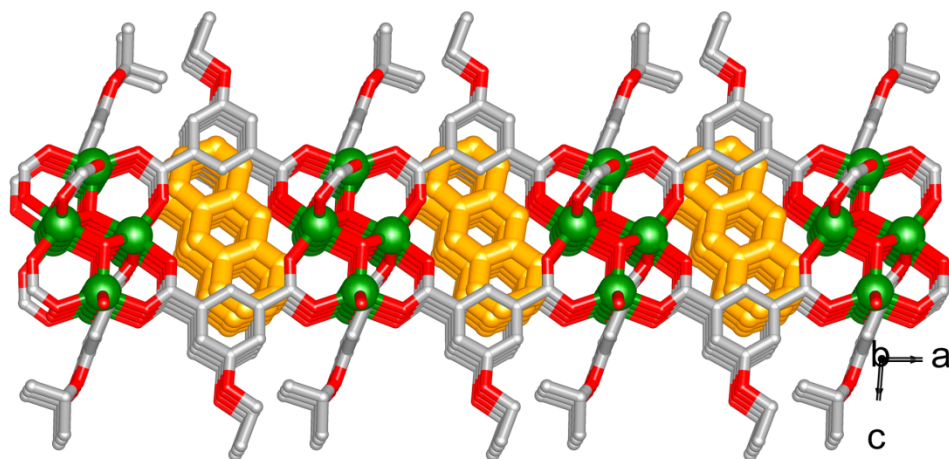

**Figure S8.** View of the 2D layer structure of **1** along b axis with the protonated AD guests encapsulated in each grids.

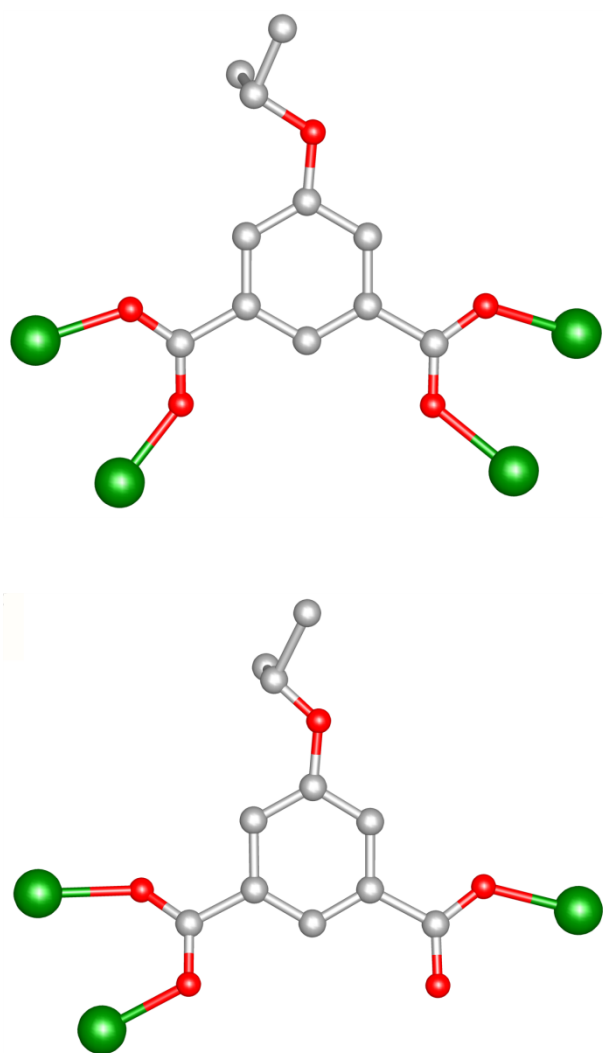

**Figure S9.** View of the coordination modes of IPOIPA ligands in **1**.

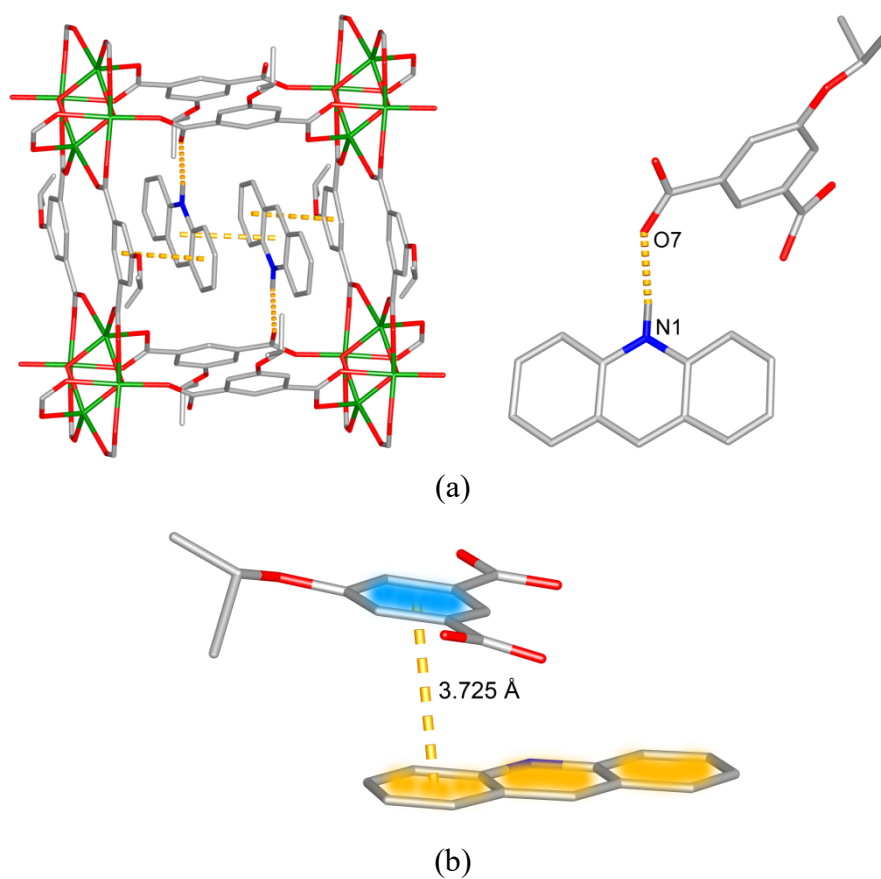

**Figure S10.** View of the N–H $\cdots$ O hydrogen-bonding (a) and  $\pi \cdots \pi$  stacking between IPOIPA and AD molecules (b) in the host-guest system.

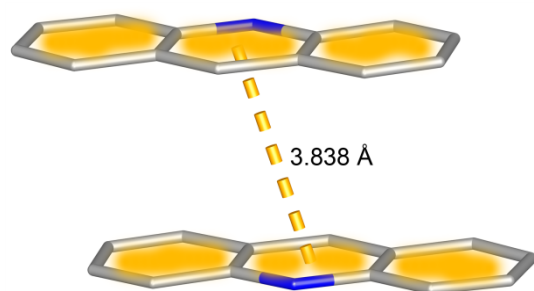

**Figure S11.** View of the  $\pi \cdots \pi$  stacking between AD and AD molecules in the host-guest system.

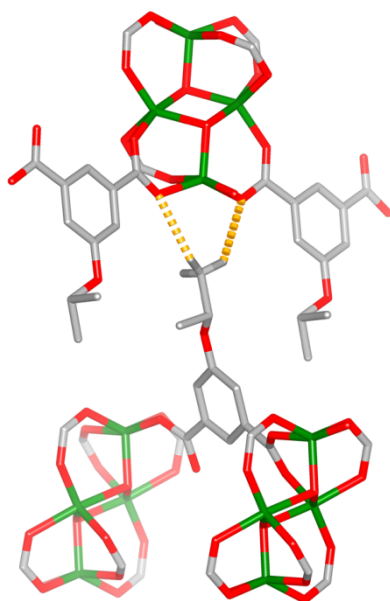

(a)

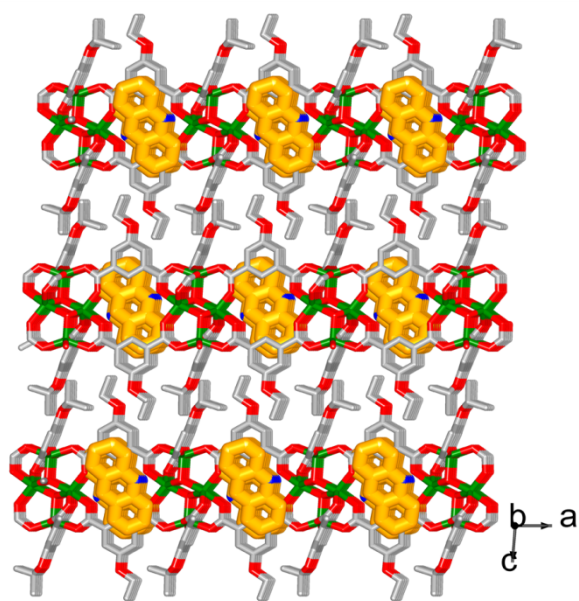

(b)

**Figure S12.** (a) C-H...O hydrogen bonding (O21-H21B...O1 and O21-H21C...O4) between carboxyl and isopropoxy groups from adjacent 2D layer. (b) View of the 3D supramolecular network of a b axis.



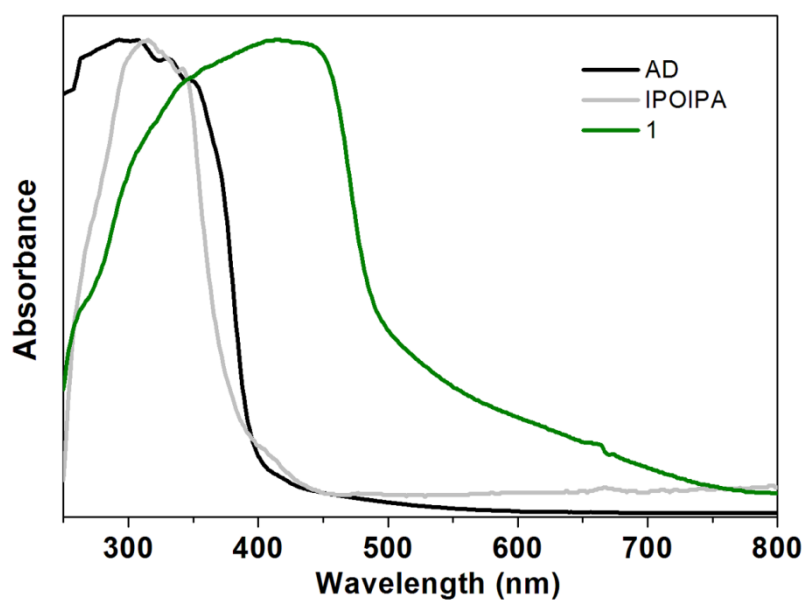

**Figure S13.** UV-vis absorption spectrum of AD, IPOIPA and **1** in solid state recorded at room temperature.

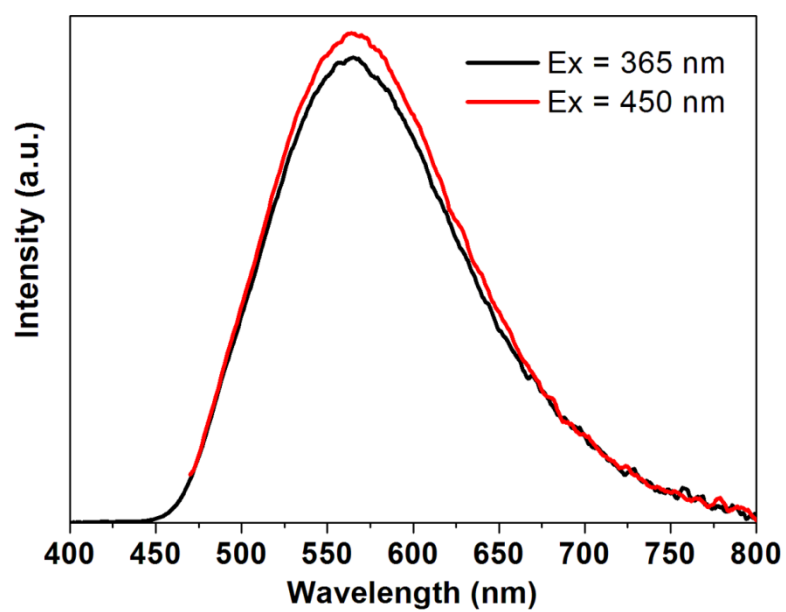

(a)

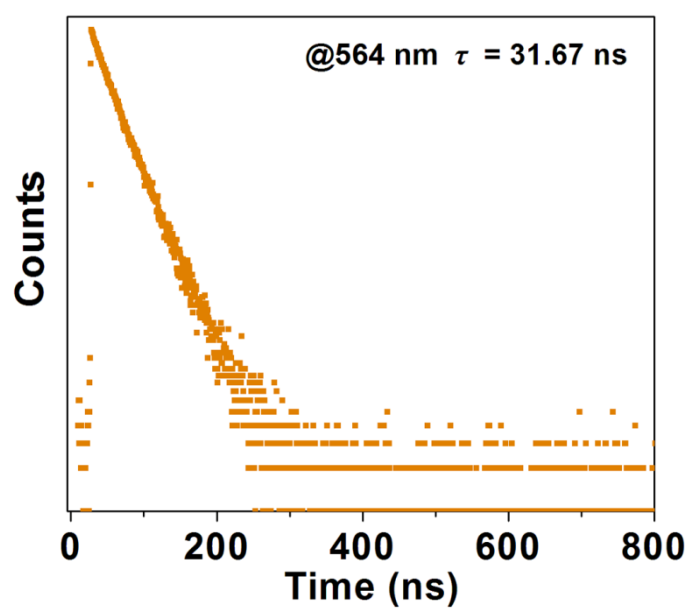

(b)

**Figure S14.** (a) PL spectra of **1** excited by 365 and 450 nm in solid state recorded at room temperature. (b) PL decay curve of **1** excited by 450 nm.

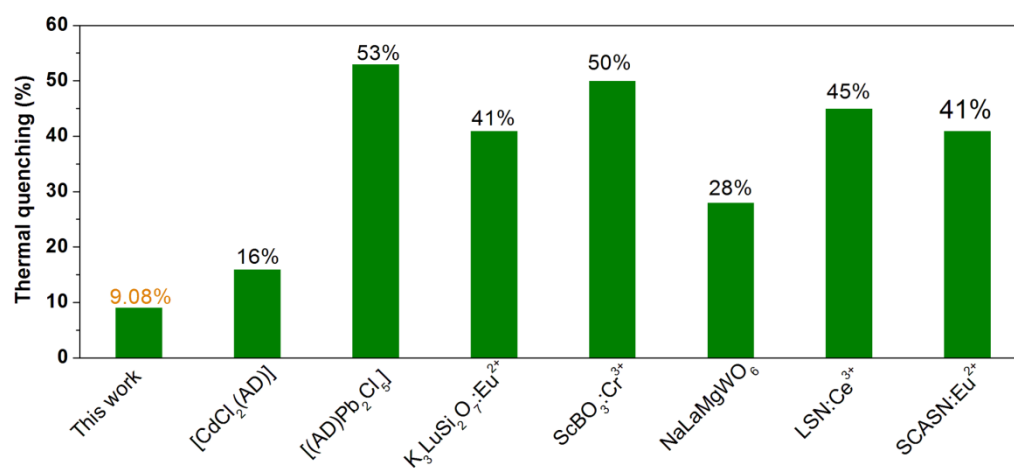

**Figure S15.** Comparison of thermal quenching for some developed phosphors.

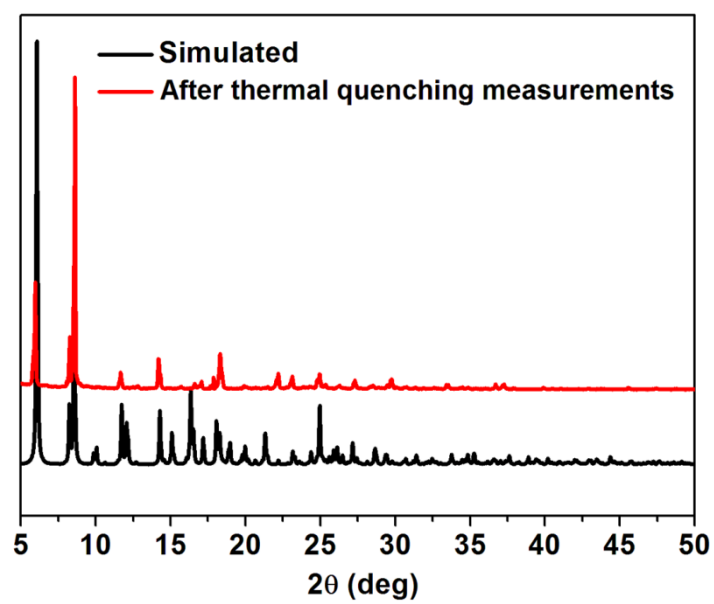

**Figure S16.** PXRD patterns of **1** after thermal quenching measurements.

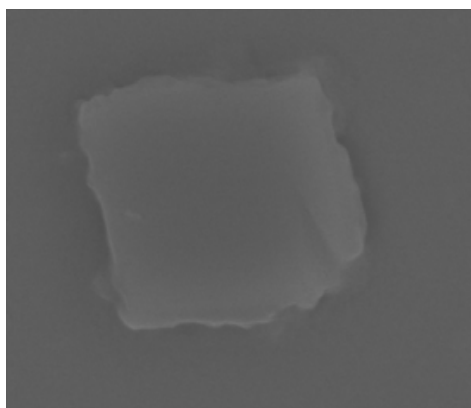

(a)

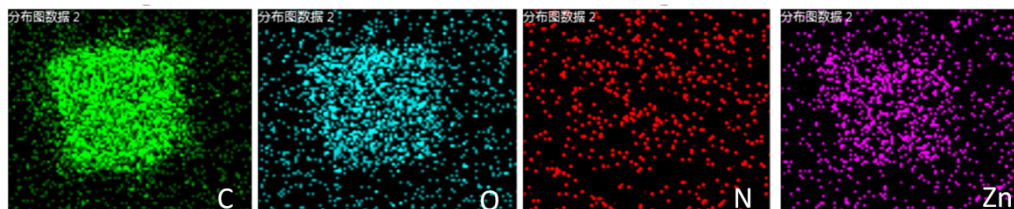

(b)

**Figure S17.** SEM image (a) and elemental mapping image (b) of **1** after thermal quenching measurements.

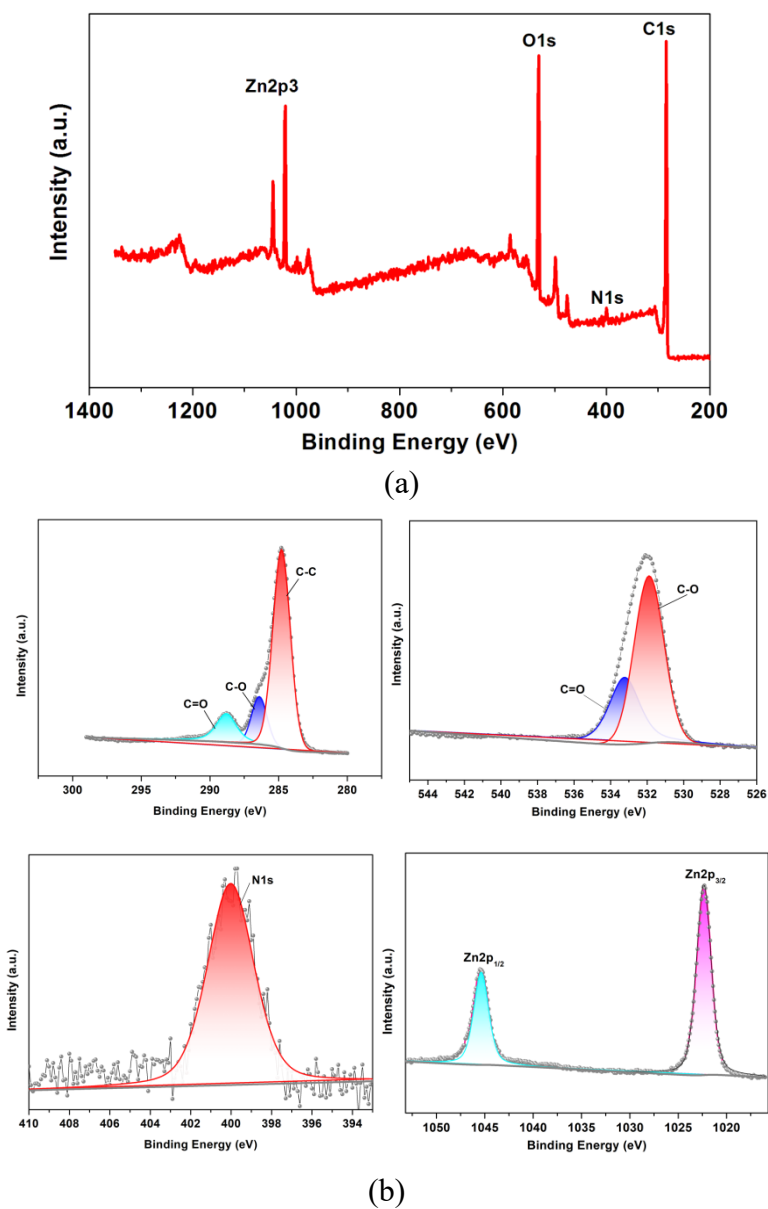

**Figure S18.** XPS survey spectrum (a), C 1s, O 1s, N 1s, and Zn 2p (b) of **1** after thermal quenching measurements.

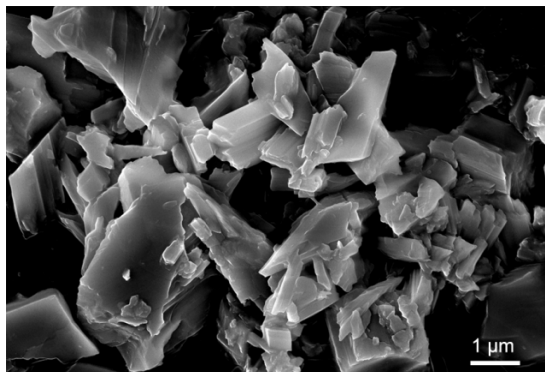

**Figure S19.** SEM image of **1** after soaking in water for 10 days.

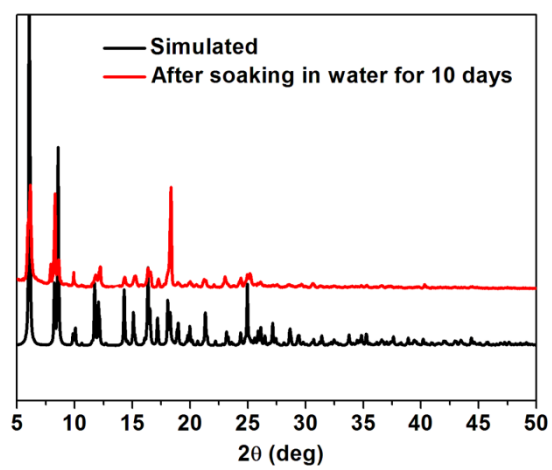

**Figure S20.** PXRD patterns of **1** after soaking in water for 10 days.



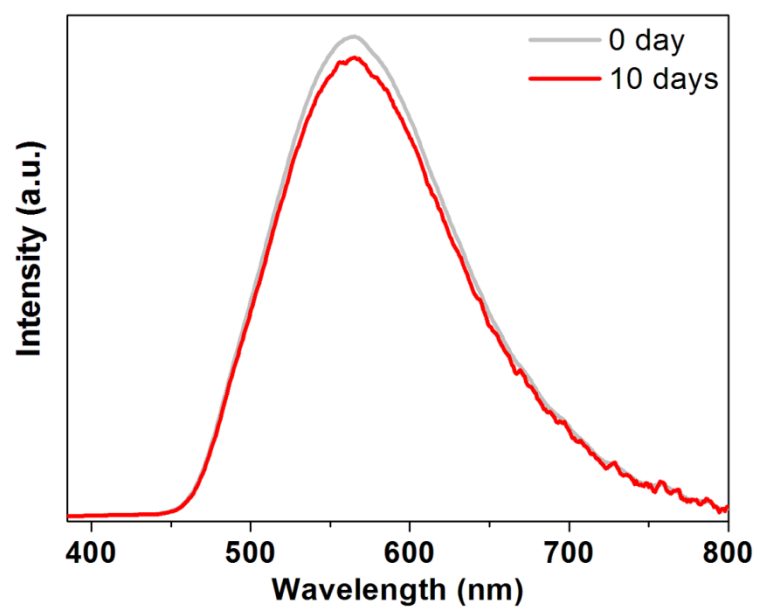

**Figure S21.** PL spectra 1 before and after being soaked in water for 10 days.

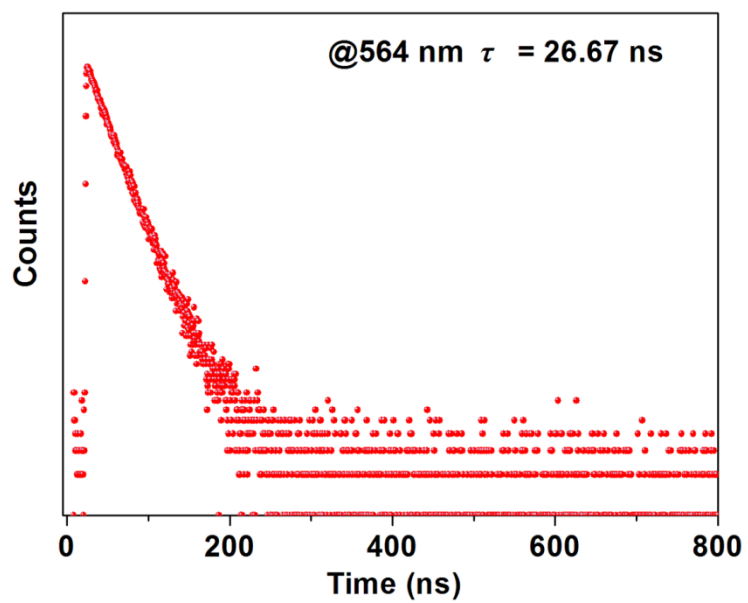

**Figure S22.** PL decay curve of **1** after soaking in water for 10 days.

## D. Supporting Table

**Table S1.** Crystallographic data for **1**.

| Sample                                                           | 1                                                                |
|------------------------------------------------------------------|------------------------------------------------------------------|
| Chemical formula                                                 | C <sub>35</sub> H <sub>31</sub> NO <sub>11</sub> Zn <sub>2</sub> |
| Formula weight                                                   | 772.35                                                           |
| Crystal system                                                   | monoclinic                                                       |
| Space group                                                      | <i>P</i> 2 <sub>1</sub> /c                                       |
| <i>a</i> (Å)                                                     | 10.7517(7)                                                       |
| <i>b</i> (Å)                                                     | 11.0322(16)                                                      |
| <i>c</i> (Å)                                                     | 29.181(3)                                                        |
| <i>V</i> (Å <sup>3</sup> )                                       | 3451.1(6)                                                        |
| <i>Z</i>                                                         | 4                                                                |
| <i>D</i> (g cm <sup>-3</sup> )                                   | 1.487                                                            |
| $\mu$ (mm <sup>-1</sup> )                                        | 1.451                                                            |
| <i>T</i> (K)                                                     | 293(2)                                                           |
| <i>R</i> <sub>int</sub>                                          | 0.0649                                                           |
| Goof                                                             | 1.075                                                            |
| <i>R</i> <sub>I</sub> <sup>a</sup> ( <i>I</i> > 2σ( <i>I</i> ))  | 0.0989                                                           |
| <i>wR</i> <sub>2</sub> <sup>b</sup> ( <i>I</i> > 2σ( <i>I</i> )) | 0.2340                                                           |

<sup>a</sup>  $R_1 = \Sigma(|F_o| - |F_c|)/\Sigma|F_o|$ ; <sup>b</sup>  $wR_2 = [\Sigma w(|F_o|^2 - |F_c|^2)^2/\Sigma w(F_o^2)^2]^{1/2}$

## D. Supporting References

- [1] CrysAlisPro, Rigaku Oxford Diffraction, Version 1.171.39.6a.
- [2] G. M. Sheldrick, SHELXT-Integrated space-group and crystal-structure determination. *Acta Crystallogr, A: Found. Adv.* 2015, **71**, 3–8.
- [3] G. M. Sheldrick, Crystal structure refinement with SHELXL. *Acta Crystallogr, Sect. C: Struct. Chem.* 2015, **71**, 3–8.
- [4] (a) B. Delley, An all-electron numerical method for solving the local density functional for polyatomic molecules. *J. Chem. Phys.* 1990, **92**, 508–517; (b) B. Delley, From molecules to solids with the DMol<sup>3</sup> approach. *J. Chem. Phys.* 2000, **113**, 7756–7764; (c) Dmol<sup>3</sup> Module, MS Modeling, Version 2.2; Accelrys Inc.: San, Diego, 2003.
